# Supplementary material for: Synthesis of Lewis adduct-based indenophenanthridine and study of its tunable optoelectronic properties toward an amine sensor
Source: Royal Society of Chemistry journal article supplement (doi:10.1039/d3nj03299j), 2023-01-01
Supplement: d3nj03299j1.pdf [file d3nj03299j1.pdf]

## “Synthesis of Lewis adduct based Indenophenanthridine and their study of Tunable Optoelectronic properties and Amine sensor”

Kannan Jamuna<sup>#[a]</sup>, Prasannamani Govindharaj<sup>#[b]</sup>, Rajaram Kamalakkannan<sup>a</sup>, Aravind Krishnan<sup>c</sup>, Amal Tom Sebastian<sup>a</sup>, Przemyslaw Data<sup>b\*</sup>, Natarajan Savitha Devi<sup>d</sup> and Shanmugam Sivakumar<sup>a\*</sup>

a. Department of Organic Chemistry, School of Chemistry, Madurai Kamaraj University, Madurai-625021, India.

b. Łódź University of Technology, Department of Chemistry, Stefana Żeromskiego 114, 90 543 Łódź, Poland.

c. Department of Chemistry, Saint Berchmans College, Changanassery, Kerala, India.

d. Department of Chemistry, Arul Anandar College, Karumathur, Madura. India.

# These authors contributed equally.

\* Corresponding authors.

Email: [sivakumar.chemistry@mkuniversity.ac.in](mailto:sivakumar.chemistry@mkuniversity.ac.in)

Email: [przemyslawdata@gmail.com](mailto:przemyslawdata@gmail.com)

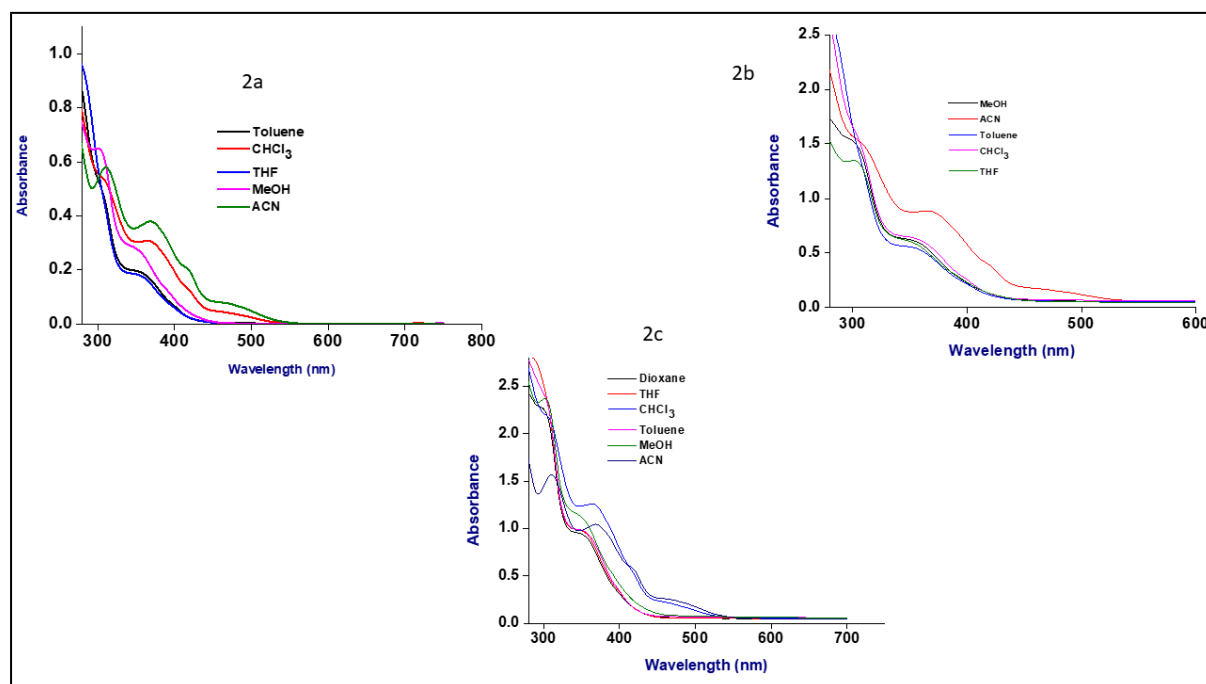

Figure S.I.1 : UV-Vis spectral changes for boron adducts 2a-2c  $5 \times 10^{-5}$  M in different solvents.

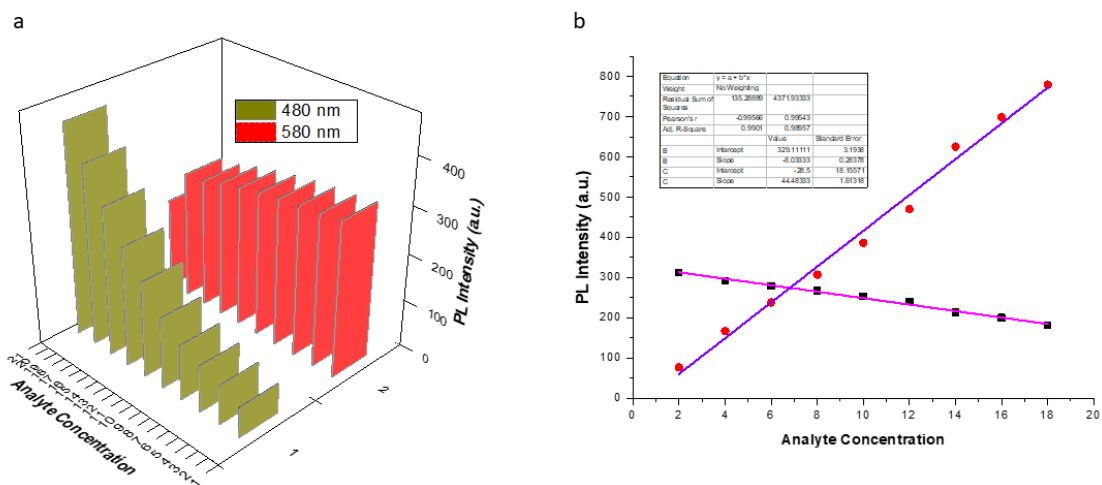

Figure S.I.2: (a) UV-Vis spectral changes for boron adducts 2a  $5 \times 10^{-5}$  M in different concentration of ammonia (0-100  $\mu$ L) (b) UV-Vis spectral changes for boron adducts 2a  $5 \times 10^{-5}$  M in different concentration of isopropylamine (0-100  $\mu$ L).

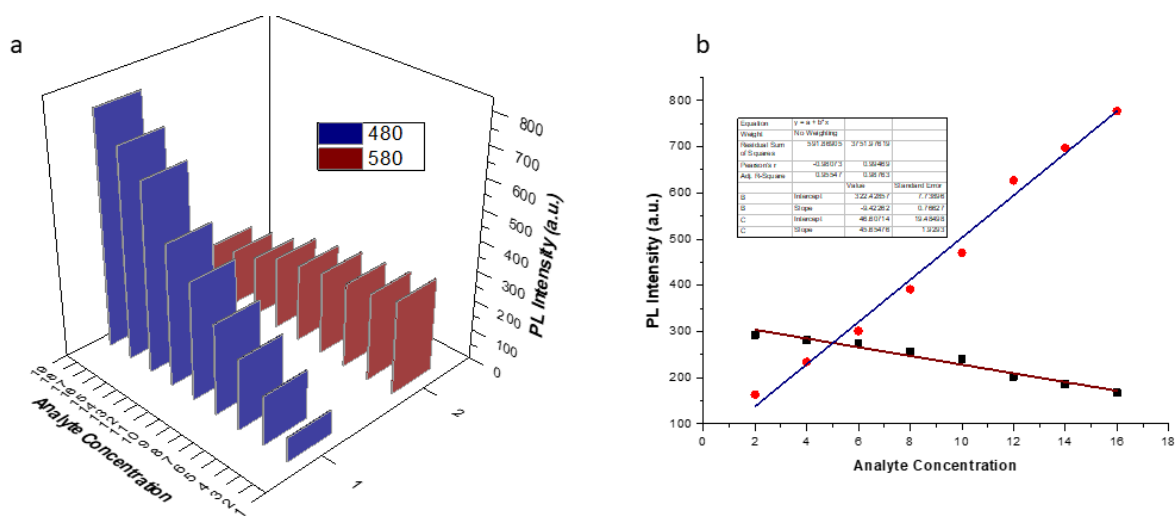

Figure S.I.3: (a) Emission responses of probe with different concentration of Ammonia in ACN (0-100  $\mu$ L) (b) Emission responses of probe with different concentration of Ammonia in ACN (0-100  $\mu$ L).

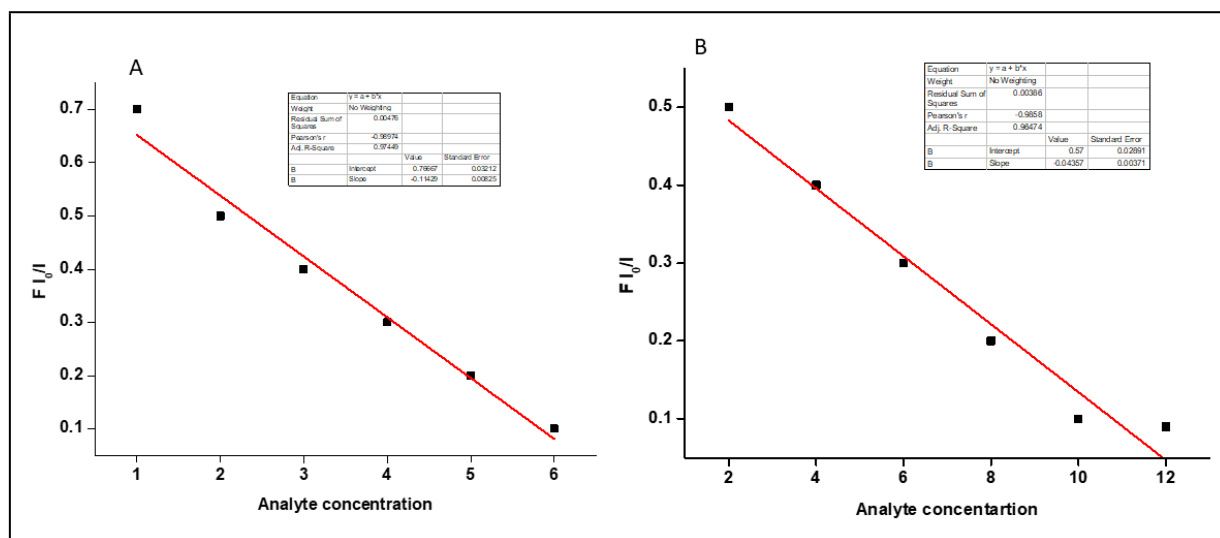

**Figure S.I.4: Stern-Volmer plots (A) Ammonia sensitivity (B) Iso propylamine sensitivity in ACN**

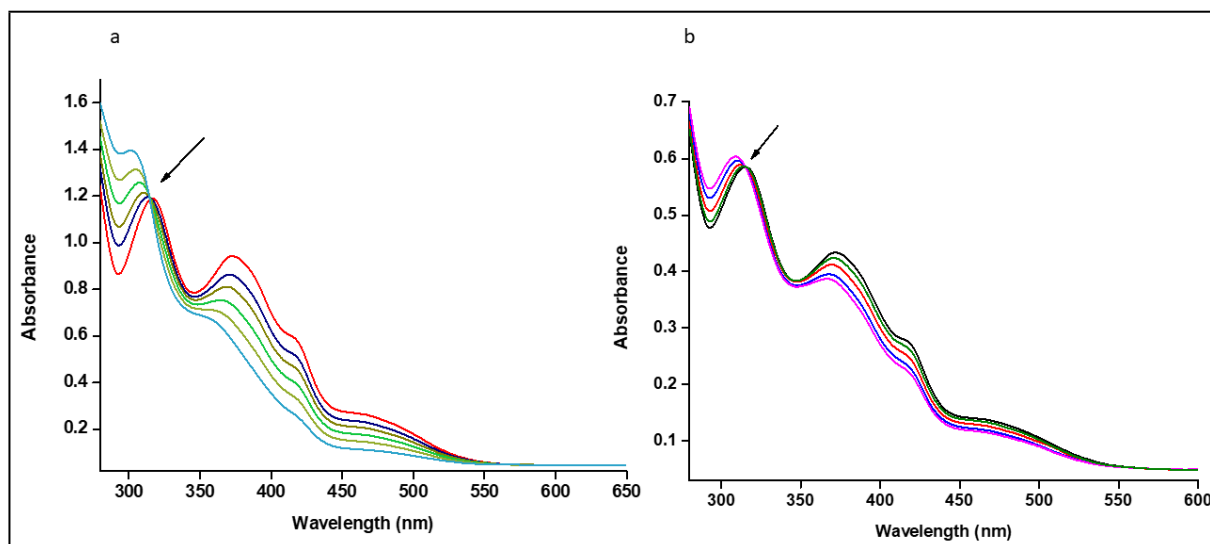

**Figure S.I.5: (a) UV-Vis responses of probe with different concentration of Iso propylamine (0-100  $\mu$ L) in ACN (b) different concentration of Ammonia (0-100  $\mu$ L) in ACN.**

| Dye | $\tau_1$ (ns) | A | B | $\tau_{\text{average}}$ (ns) | $\chi^2$ |
|-----|---------------|---|---|------------------------------|----------|
|-----|---------------|---|---|------------------------------|----------|

|           |      |     |       |      |      |
|-----------|------|-----|-------|------|------|
| <b>2a</b> | 2.45 | 1.2 | 0.07  | 2.45 | 1.23 |
| <b>2b</b> | 2.4  | 3.4 | 0.072 | 2.38 | 1.28 |
| <b>2c</b> | 2.4  | 3.4 | 0.073 | 2.4  | 1.20 |

**Table S.I.1: Fluorescence lifetime Parameters of compound 2a-c**

| Dye | HOMO (eV) | LUMO (eV) | $\Delta E$ (eV) |
|-----|-----------|-----------|-----------------|
| 2a  | -6.5740   | -3.0825   | 3.4915          |
| 2b  | -6.5759   | -3.0937   | 3.4822          |
| 2c  | -6.6037   | -3.1078   | 3.4958          |

**Table S.I.2: Calculated HOMO and LUMO energy levels in dyes 2a-2c by DFT calculation**

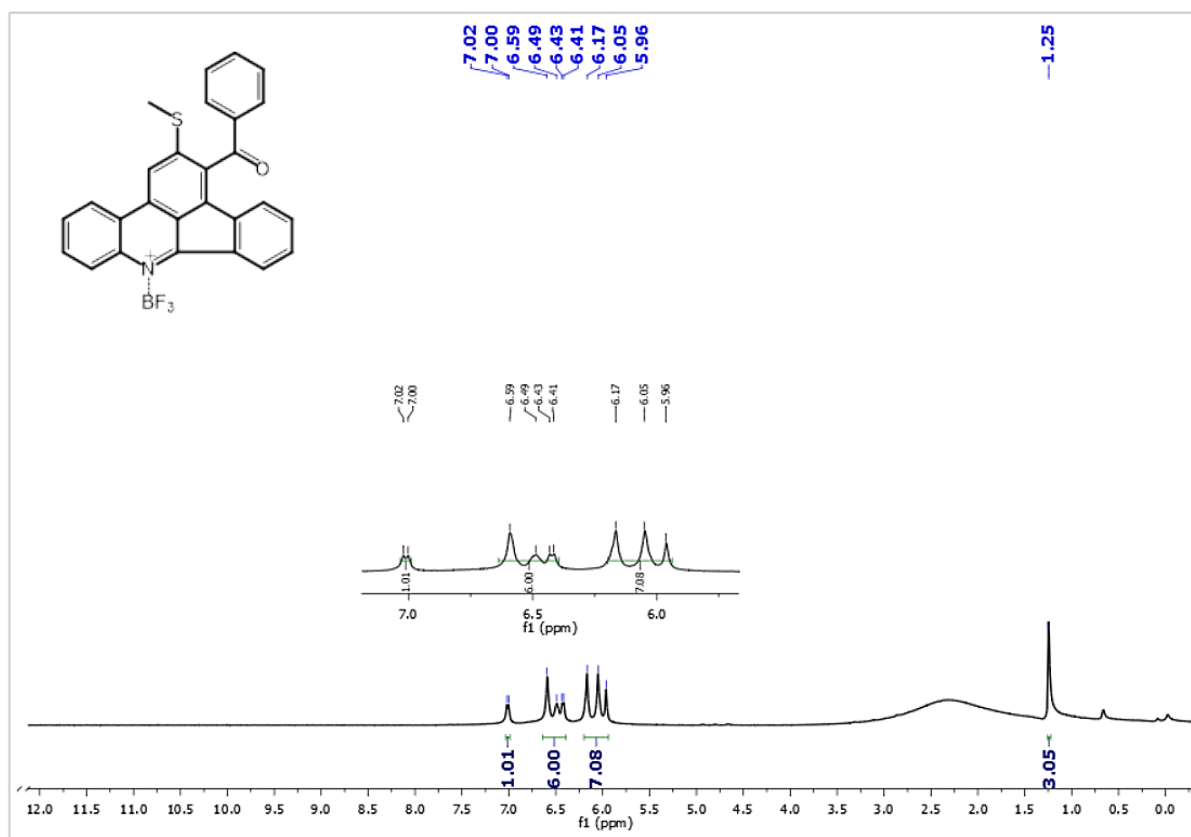

**Figure S.I.6 : <sup>1</sup>H NMR spectrum of compound 2a**

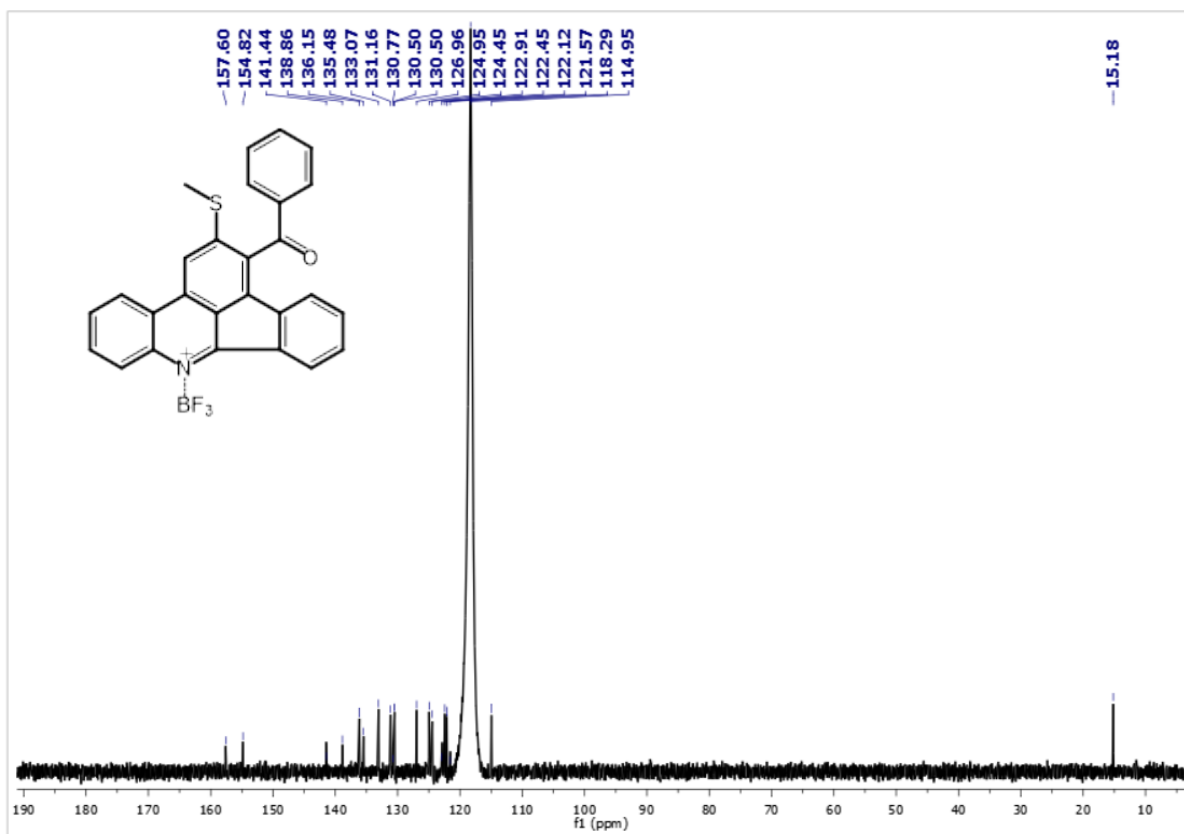

Figure S.I.7 :  $^{13}\text{C}$  NMR spectrum of compound 2a

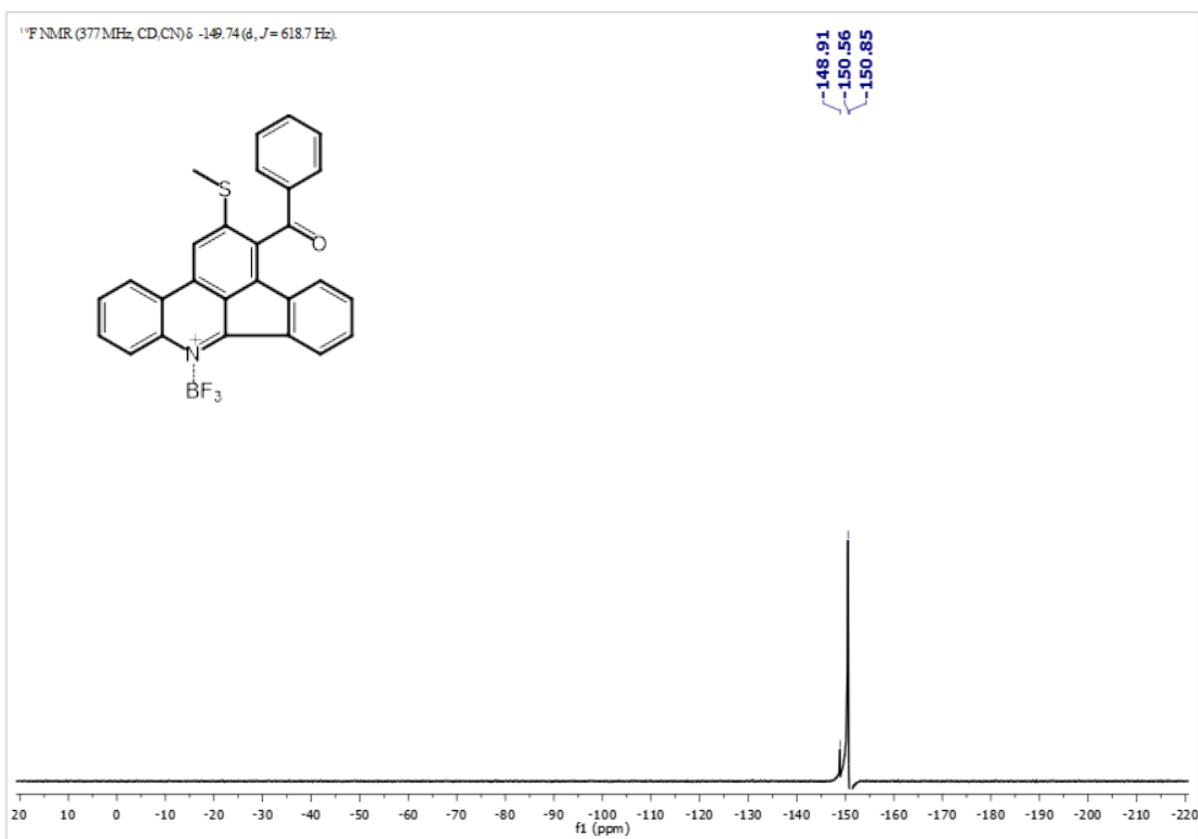

Figure S.I.8:  $^{19}\text{F}$  NMR spectrum of compound 2a

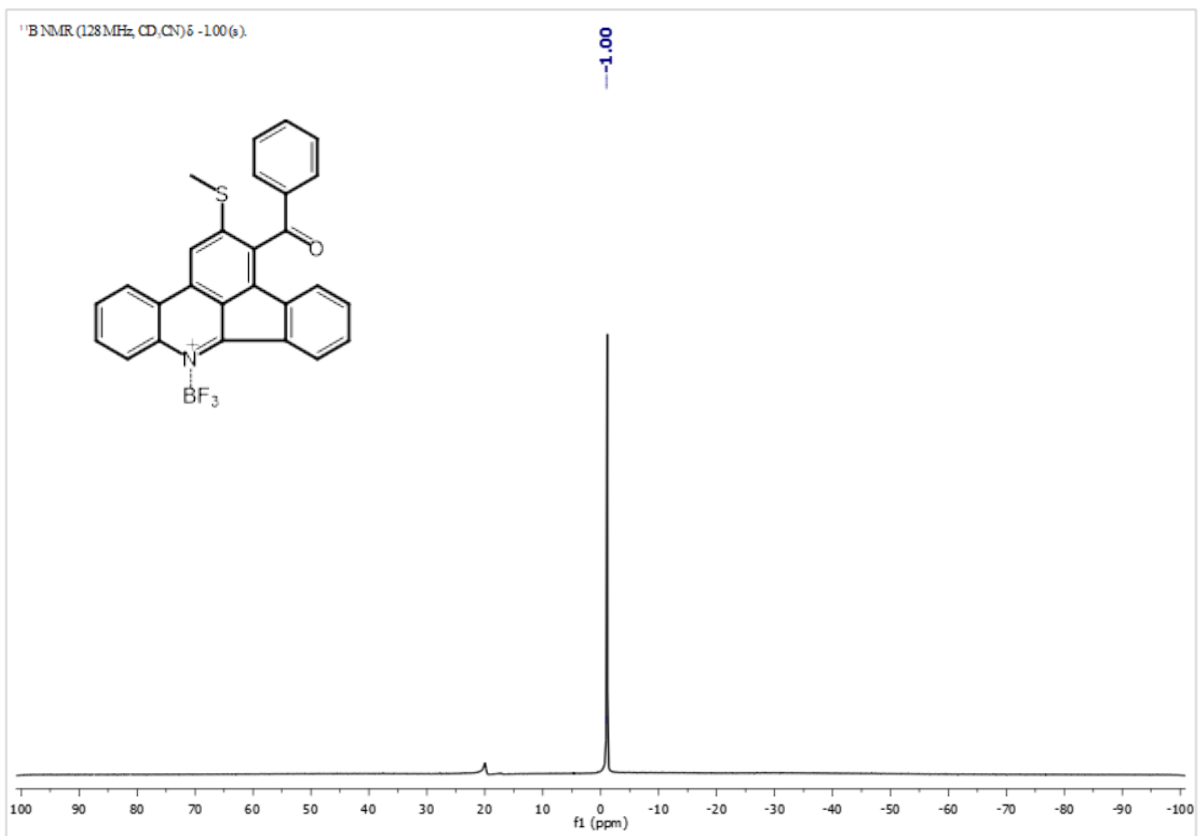

Figure S.I.9:  $^{11}\text{B}$  NMR spectrum of compound 2a

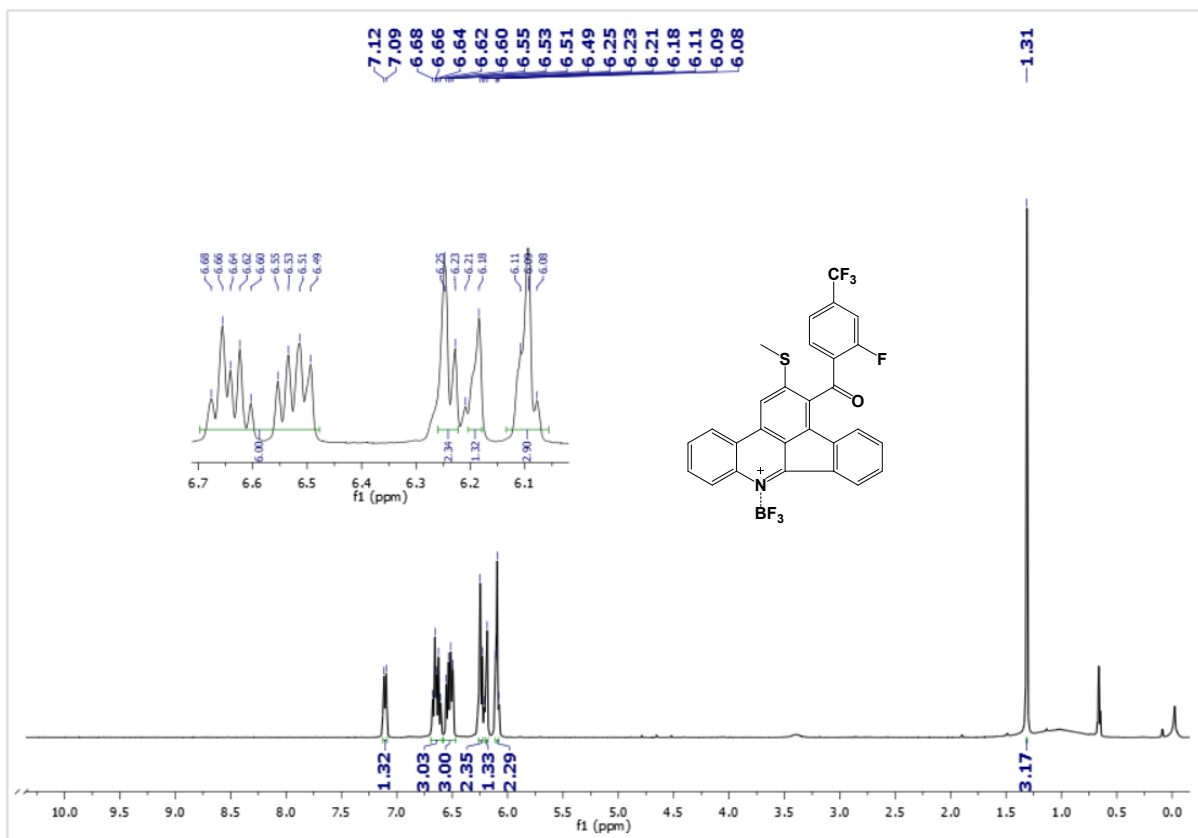

Figure S.I.10 :  $^1\text{H}$  NMR spectrum of compound 2b

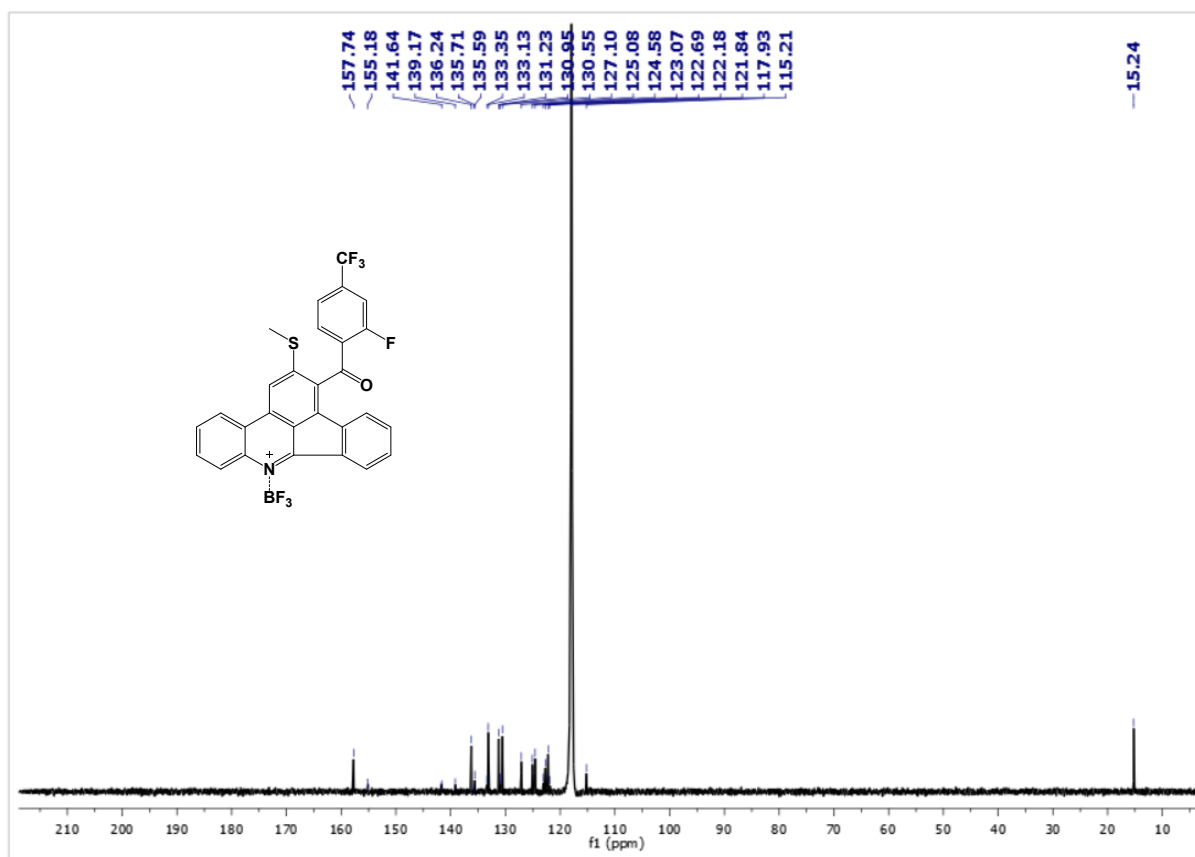

Figure S.I.11 :  $^{13}\text{C}$  NMR spectrum of compound 2b

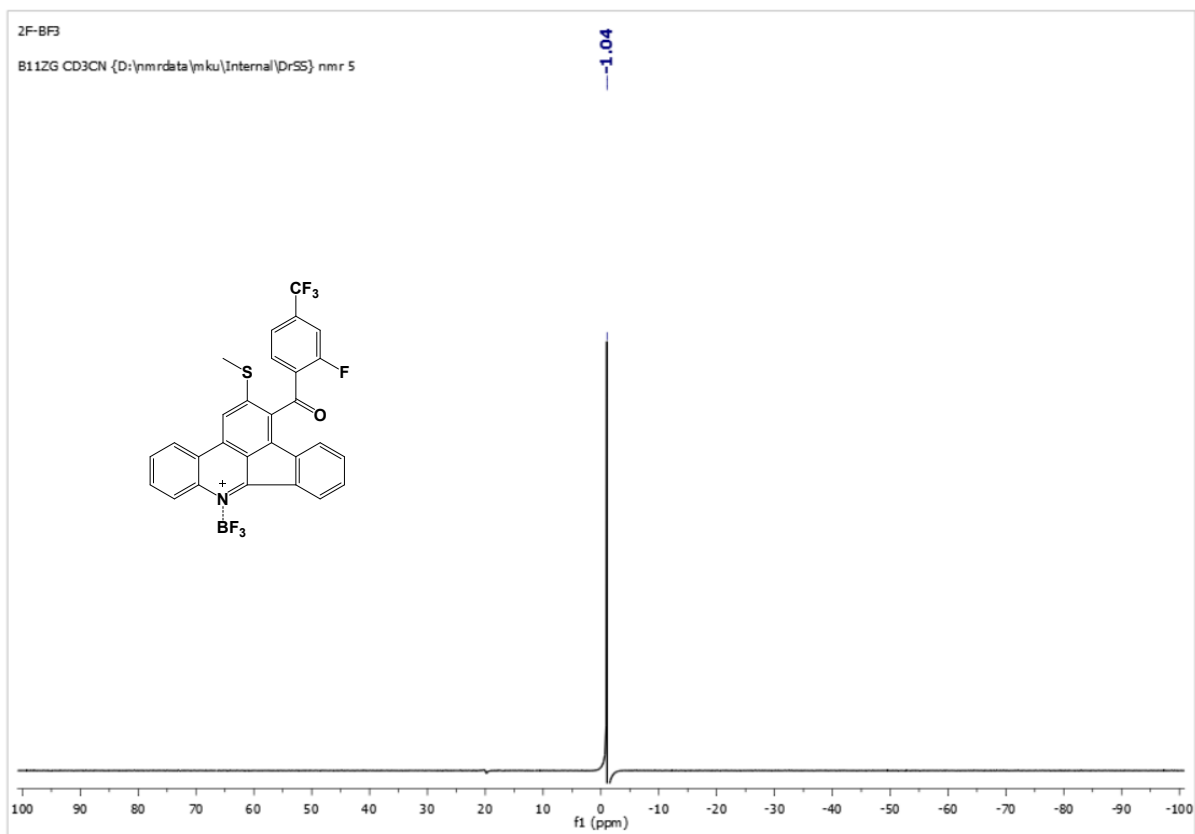

Figure S.I.12:  $^{11}\text{B}$  NMR spectrum of compound 2b

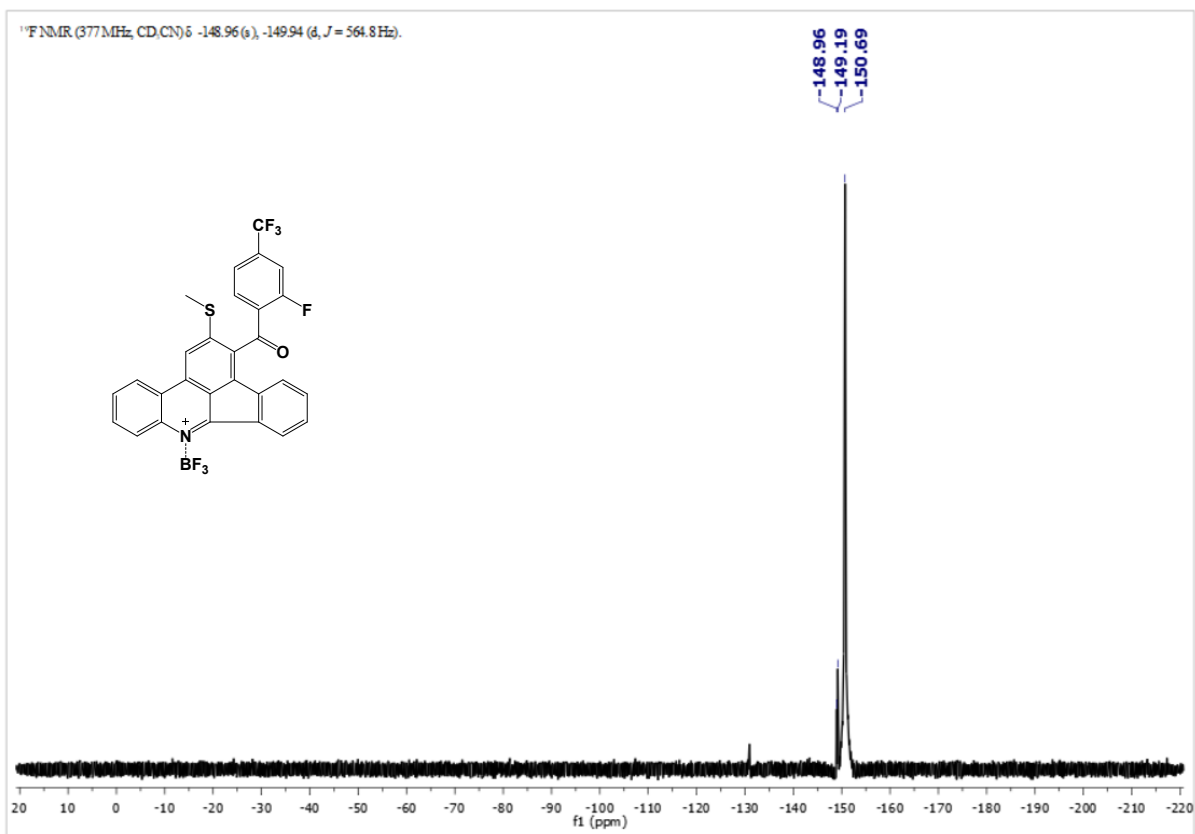

Figure S.I.13:  $^{19}\text{F}$  NMR spectrum of compound 2b

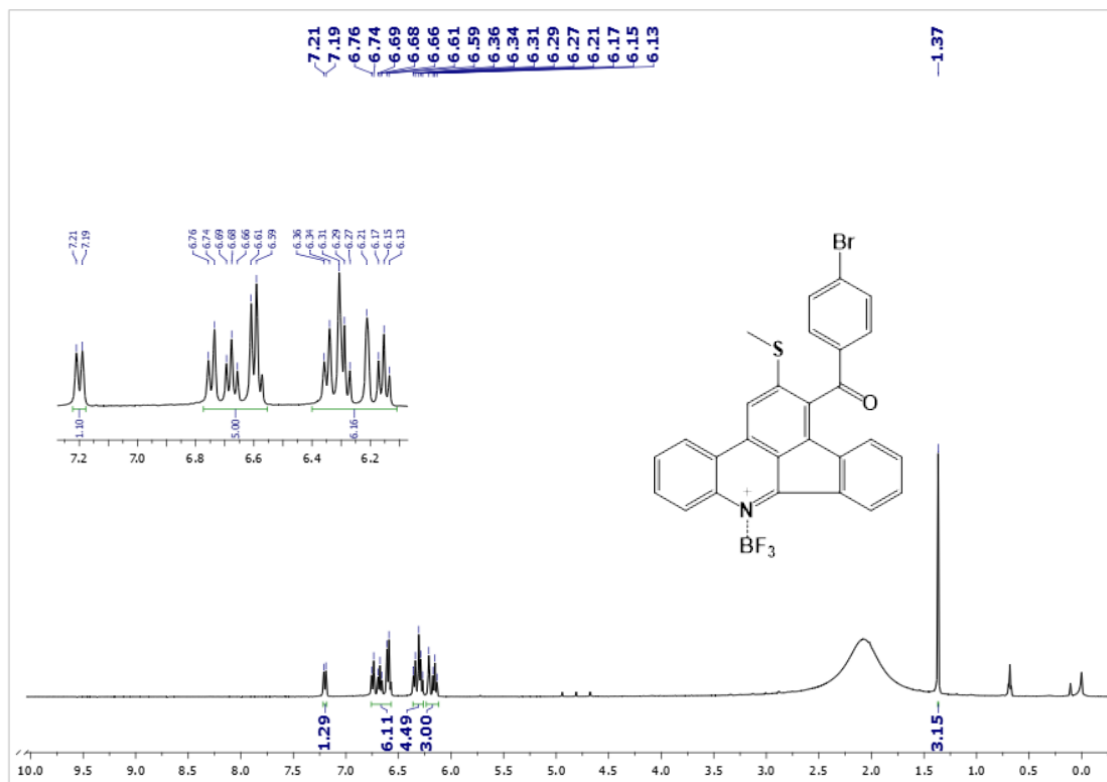

Figure S.I.14 :  $^1\text{H}$  NMR spectrum of compound 2c



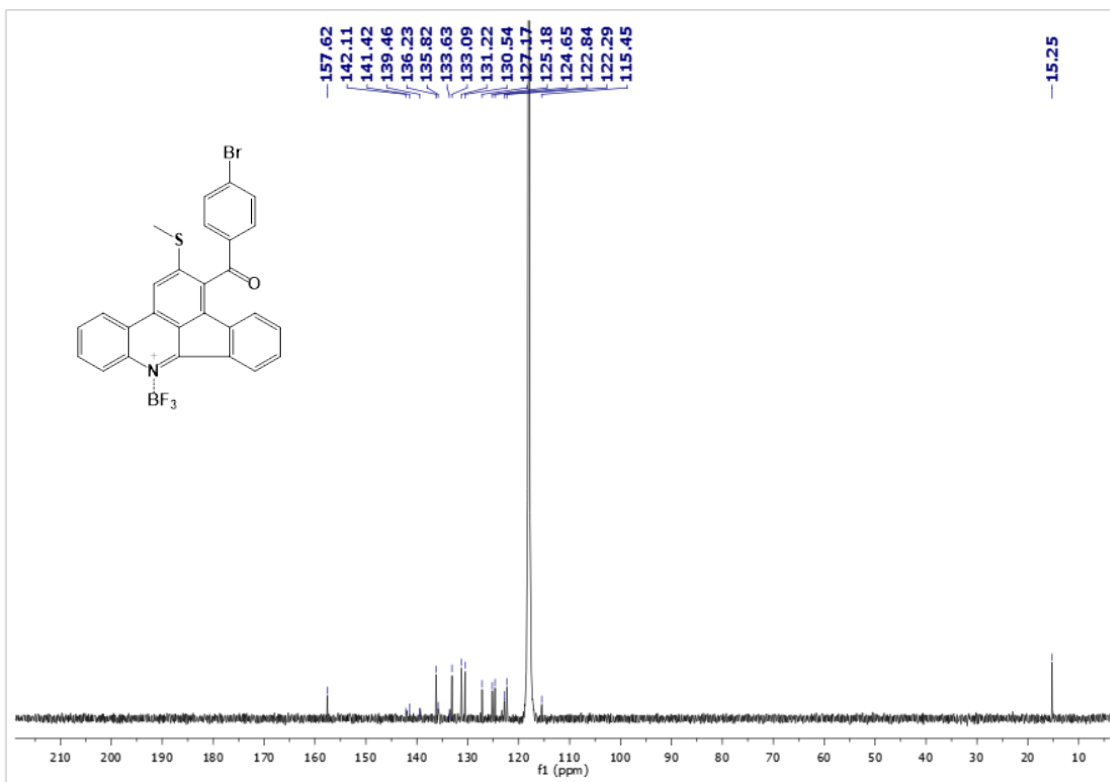

Figure S.I.15 : <sup>13</sup>C NMR spectrum of compound 2c

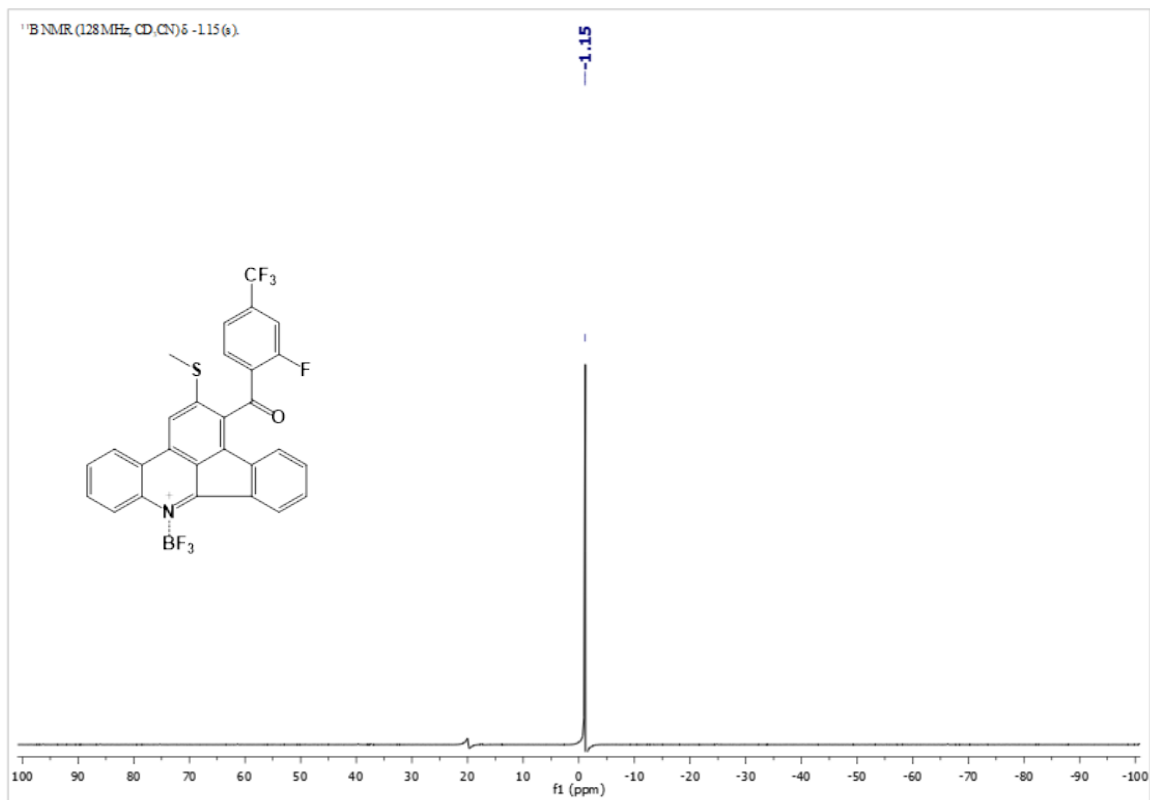

Figure S.I.16: <sup>11</sup>B NMR spectrum of compound 2c

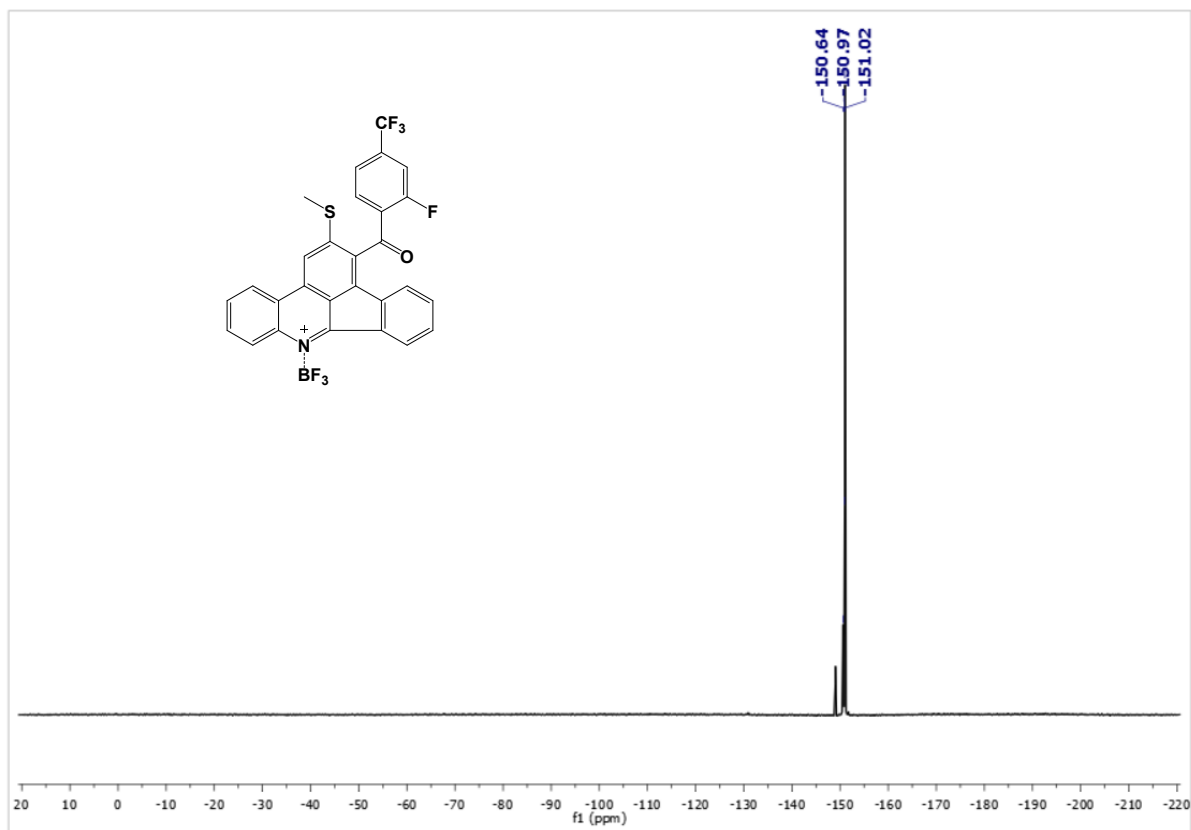

Figure S.I.17:  $^{19}\text{F}$  NMR spectrum of compound 2c

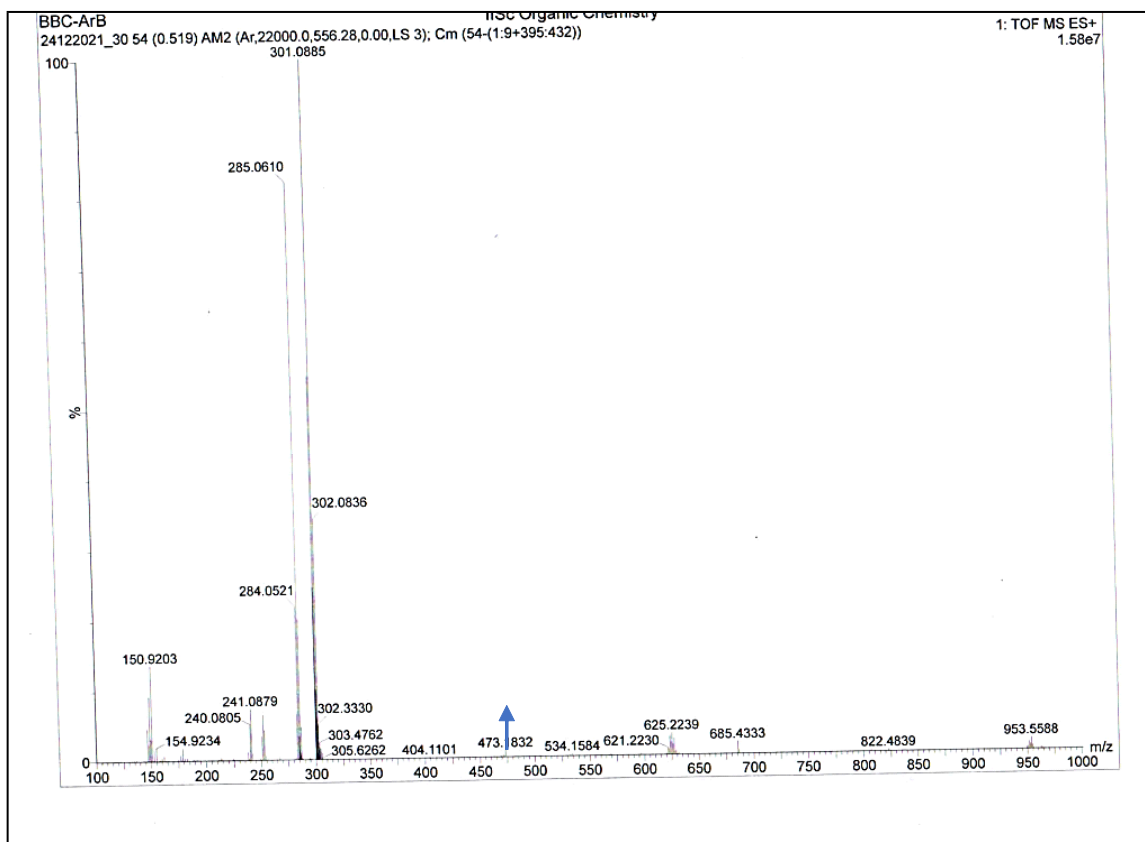

Figure S.I.18: HRMS spectrum of compound 2a.

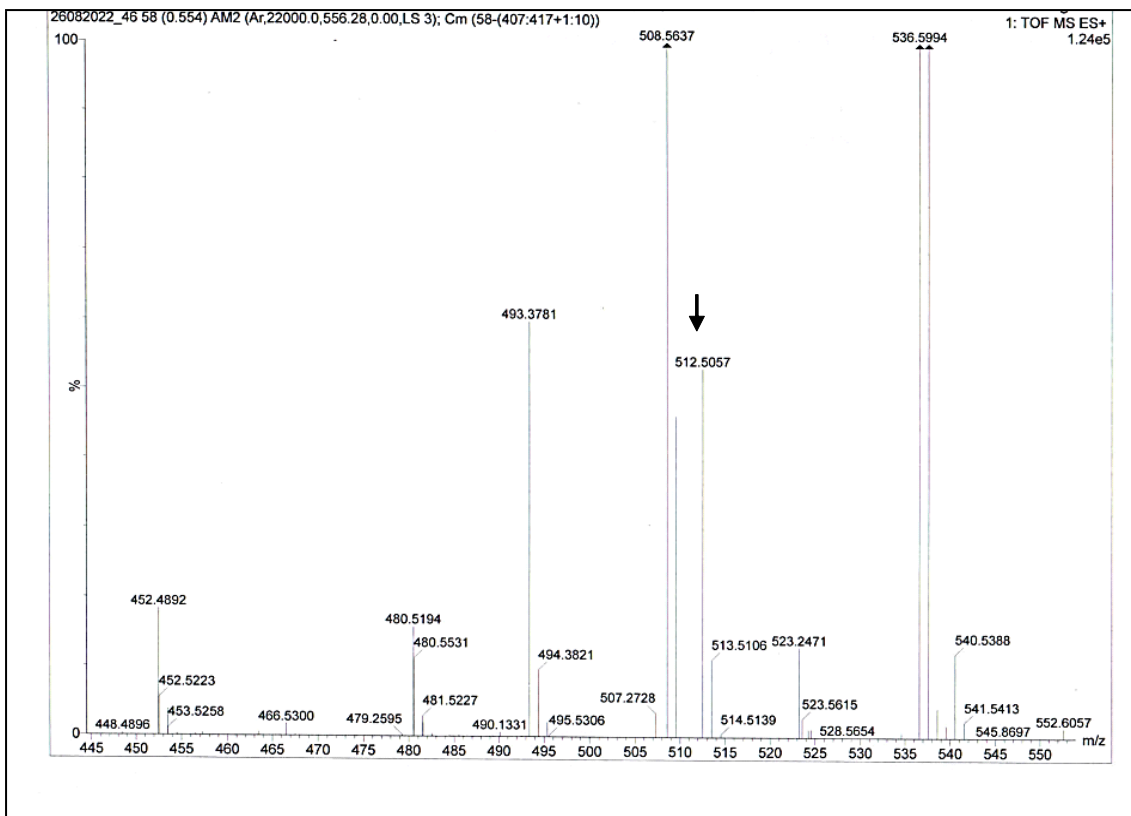

Figure S.I.19: HRMS spectrum of compound 2b

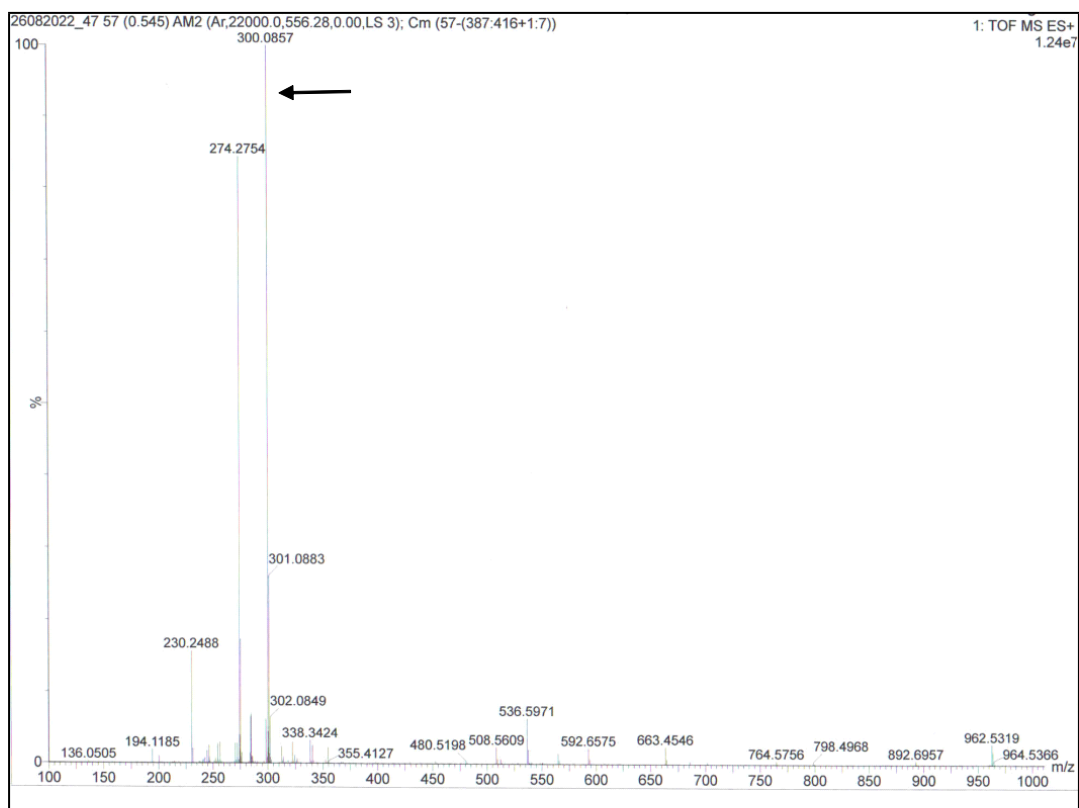

Figure S.I.20: LCMS spectrum of compound 2c
